# Supplementary material
Source: Springer Nature journal article supplement (https://www.springermedizin.de/resource/supplementary/12889_2013_6273_MOESM5_ESM.pdf/9498894)

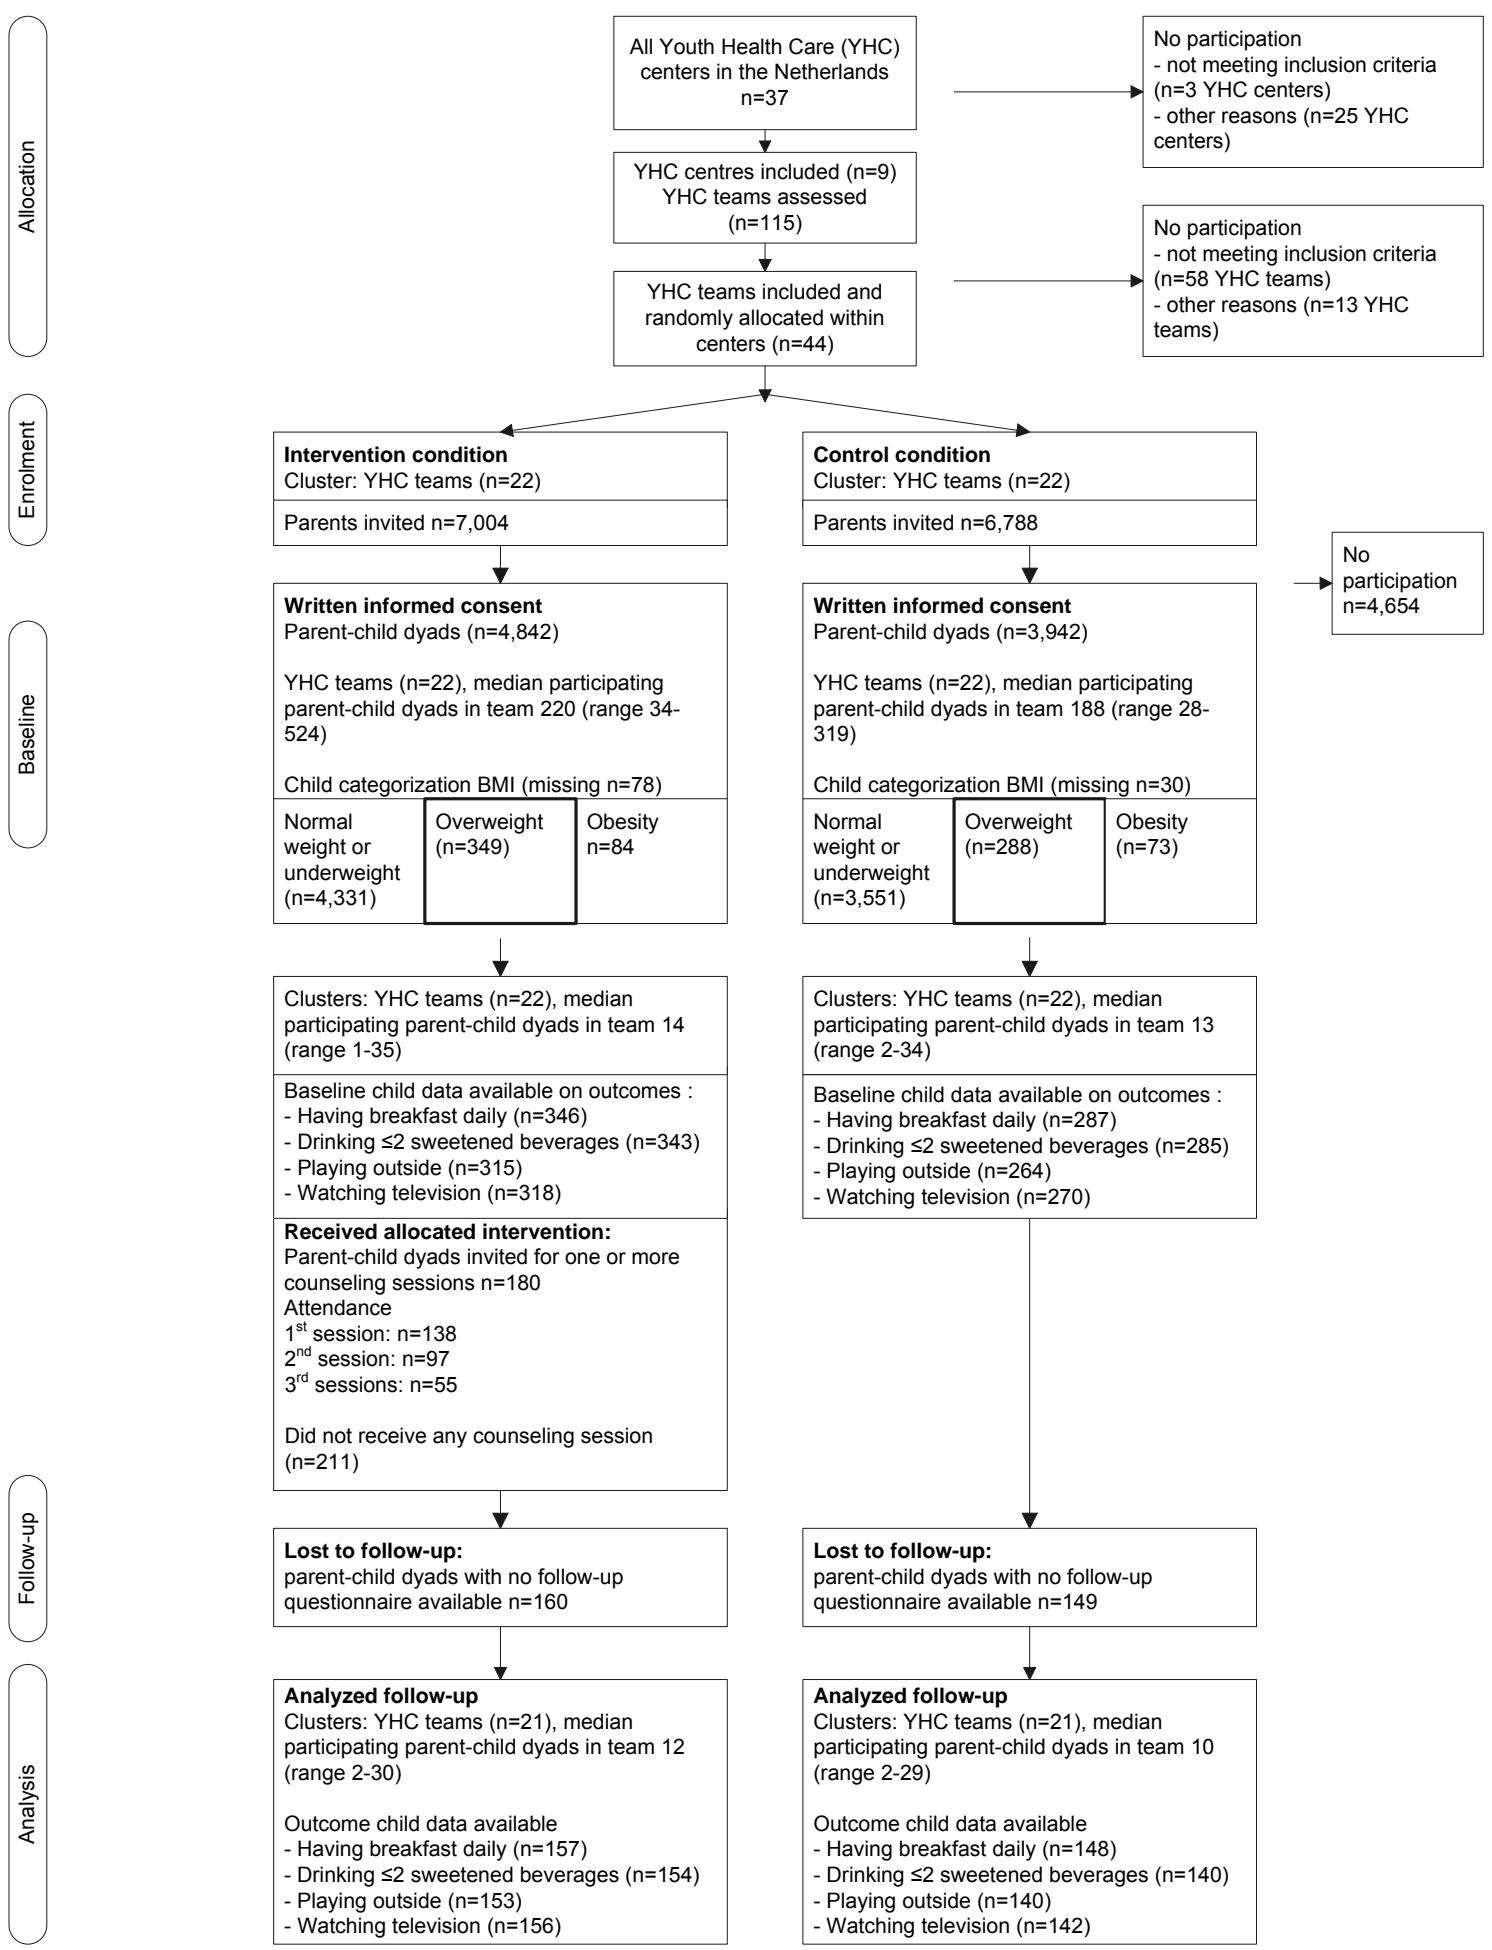

Supplement: MOESM5 [file 9498894]
